# ESMO Minimum Clinical Recommendations for prophylaxis of chemotherapy-induced nausea and vomiting (NV)

## Definitions

- Acute nausea and vomiting: Initial 24 hours after chemotherapy.
- Delayed nausea and vomiting: Later than 24 hours after chemotherapy.
- Anticipatory nausea and vomiting: Days to hours before chemotherapy.

Low (emetic risk between 10–30%):

### Oral agents:

Cyclophosphamide  
Etoposide  
Temozolomide  
Vinorelbine  
Imatinib

### Intravenous agents:

Topotecan  
Gemcitabine  
Liposomal doxorubicin  
Mitoxantrone  
Docetaxel  
Paclitaxel  
Etoposide  
Teniposide  
Pemetrexed  
Methotrexate  
Mitomycin  
Fluorouracil  
Cytarabine < 100 mg/m<sup>2</sup>  
Bortezomib  
Cetuximab  
Trastuzumab

## Other causes of nausea and vomiting to be considered

- Radiotherapy, radiosensitizers, infection, metabolic disorders, electrolyte disturbances, constipation, gastrointestinal obstruction, cachexia syndrome, metastases (brain, liver, bone), paraneoplasia, other emetogenic medication (e.g. opioids, antibiotics, antifungals, amifostine) and psychological. The relative emetogenic potentials of chemotherapy are listed in Table 1.

**Table 1.** Relative emetogenic potential of chemotherapy (if no anti-emetic prophylaxis is used)

| High (emetic risk 90% or more): | Intravenous agents:                      | Minimal (emetic risk less than 10%): | Oral agents:                         |
|---------------------------------|------------------------------------------|--------------------------------------|--------------------------------------|
|                                 | Cisplatin                                |                                      | Capecitabine                         |
|                                 | Mechlorethamine                          |                                      | Fludarabine                          |
|                                 | Streptozocin                             |                                      | Intravenous agents:                  |
|                                 | Carmustine                               |                                      | Bleomycin                            |
|                                 | Cyclophosphamide >1500 mg/m <sup>2</sup> |                                      | Busulfan (not for high-dose therapy) |
|                                 | Dacarbazine                              |                                      | 2-Chlorodeoxyadenosine               |
|                                 | Oral agents:                             |                                      | Fludarabine                          |
|                                 | Hexamethylmelamine                       |                                      | Vincristine                          |
|                                 | Procarbazine                             |                                      | Vinblastine                          |
|                                 | Intravenous agents:                      |                                      | Vinorelbine                          |
|                                 | Oxaliplatin                              |                                      | Bevacizumab                          |
|                                 | Cytarabine >1 gm/m <sup>2</sup>          |                                      | Oral agents:                         |
|                                 | Carboplatin                              |                                      | Chlorambucil                         |
|                                 | Ifosfamide                               |                                      | Hydroxyurea                          |
|                                 | Cyclophosphamide <1500 mg/m <sup>2</sup> |                                      | L-Phenylalanine mustard              |
|                                 | Doxorubicin                              |                                      | 6-Thioguanine                        |
|                                 | Epirubicin                               |                                      | Methotrexate                         |
|                                 | Daunorubicin                             |                                      | Gefitinib                            |
|                                 | Idarubicin                               |                                      |                                      |
|                                 | Irinotecan                               |                                      |                                      |

## Anti-emetics

- 5-hydroxytryptamine type 3 receptor (5HT<sub>3</sub>) (serotonin) antagonists, corticosteroids and aprepitant are usually given

once daily. However, for delayed emesis corticosteroids are given b.i.d. Dopamine antagonists are given 3–4 times daily. For routine use oral doses are recommended [I, A]. Palonosetron is only available as an i.v. formulation.

**Table 2.**

| Anti-emetic drug and schedule           | Oral dose (mg)                                                 |
|-----------------------------------------|----------------------------------------------------------------|
| Serotonin antagonists (once daily):     |                                                                |
| Ondansetron <sup>a</sup>                | 16–24                                                          |
| Granisetron <sup>b</sup>                | 2                                                              |
| Tropisetron                             | 5                                                              |
| Dolasetron                              | 100                                                            |
| Palonosetron                            | 0.25 mg i.v. (no oral formulation available)                   |
| Dopamine antagonists (3–4 times daily): |                                                                |
| Metoclopramide                          | 20–30                                                          |
| Prochlorperazine                        | 10–20                                                          |
| Domperidone <sup>c</sup>                | 20                                                             |
| Metopimazine <sup>d</sup>               | 15–30                                                          |
| Corticosteroids (once daily):           |                                                                |
| Dexamethasone <sup>e</sup>              | 20                                                             |
| Prednisolone                            | 100–150                                                        |
| Methylprednisolone <sup>f</sup>         | 100                                                            |
| Neurokinin antagonists (once daily):    |                                                                |
| Aprepitant <sup>g</sup>                 | 125 mg day 1 followed by 80 mg days 2 and 3 after chemotherapy |
| Others (1–4 times daily):               |                                                                |
| Lorazepam                               | 1–2                                                            |

<sup>a</sup>Intravenous dose of ondansetron is 8 mg.

<sup>b</sup>Intravenous dose of granisetron is 1 mg.

<sup>c</sup>Not for intravenous use.

<sup>d</sup>Intravenous administration only as continuous infusion.

<sup>e</sup>Dose is evidence-based for intravenous dexamethasone only. For cisplatin-induced emesis a single i.v. 20 mg dose and for cyclophosphamide/anthracycline-based chemotherapy a single i.v. 8 mg dose is recommended day 1 after chemotherapy. Corticosteroids b.i.d. for delayed emesis.

<sup>f</sup>For intravenous use only.

<sup>g</sup>Aprepitant is metabolized via CYP3A4 and various drugs could be influenced. When cortico-steroids are combined with aprepitant, the dose of the corticosteroids should be reduced to 50%.

**Table 3.** Acute nausea and vomiting

| Emetogenic potential  | Anti-emetics                                              |
|-----------------------|-----------------------------------------------------------|
| High                  | Serotonin antagonist + corticosteroid + aprepitant [I, A] |
| Moderate <sup>a</sup> | Serotonin antagonist + corticosteroid [I, A]              |
| Low                   | A single agent such as a corticosteroid [III, IV, D]      |
| Minimal               | No routine prophylaxis [V, D]                             |

Substances of the same class are of comparable efficacy [I, A]. Anti-emetic drugs, their schedules and oral doses are listed in Table 2.

## Treatment

- Anti-emetics are given prophylactically 30–60 min before the start of chemotherapy. If a patient has nausea and vomiting, treatment should be given intravenously. Recommendations concern chemotherapy-naïve patients. In patients, who have experienced nausea and vomiting during previous chemotherapy, anti-emetic therapy should be individualized. Table 3 lists levels of emetogenic potential and the required anti-emetic treatments for acute nausea and vomiting, Table 4 for delayed nausea and vomiting and Table 5 describes specific problems.

## Note

Levels of Evidence [I–V] and Grades of Recommendation [A–D] as used by the American Society of Clinical Oncology are given in square brackets. Statements without grading were considered justified standard clinical practice by the expert authors and the ESMO faculty.

**Table 4.** Delayed nausea and vomiting

| Emetogenic potential  | Anti-emetics                                           |
|-----------------------|--------------------------------------------------------|
| High                  | Corticosteroid + aprepitant [II, A]                    |
| Moderate <sup>b</sup> | Corticosteroid [II, A] or serotonin antagonist [II, B] |
| Low                   | No routine prophylaxis                                 |
| Minimal               | No routine prophylaxis                                 |

**Table 5.** Specific problems recommendations

|                                  |                                                                                                                                                                 |
|----------------------------------|-----------------------------------------------------------------------------------------------------------------------------------------------------------------|
| Multiple day chemotherapy        | As acute NV on chemotherapy days<br>As delayed NV 1–2 days after chemotherapy<br>Aprepitant and palonosetron have not been investigated in this setting [II, A] |
| Refractory nausea and vomiting   | Add dopamine antagonists to serotonin antagonists and corticosteroids [V, D]                                                                                    |
| Anticipatory nausea and vomiting | Lorazepam or similar drugs<br>Behavioural techniques [V, D]                                                                                                     |
| High-dose chemotherapy           | Corticosteroids, serotonin and dopamine antagonists in full doses intravenously [III, C]                                                                        |

<sup>a</sup>The oral agents are those with the lowest emetic risk. A single anti-emetic is often sufficient as prophylaxis. In patients receiving daily imatinib, anti-emetics given on demand only is a reasonable approach.

<sup>b</sup>The oral agents rarely induce delayed nausea and vomiting. No routine prophylaxis after day one is recommended.

## Literature

1. Anti-emetic Subcommittee of the Multinational Association of Supportive Care in Cancer: Results of the Perugia Consensus Conference. *Ann Oncol* 1998; 9: 811–819.
2. Gralla RJ, Osoba D, Kris MG et al. Recommendations for guidelines for the use of anti-emetics: Evidence-based clinical practice guidelines. *J Clin Oncol* 1999; 17: 2971–2994.
3. Anti-emetic Resource Center at <http://www.mascc.org> (date last accessed 28 February 2005).
4. Navari RM. Role of neurokinin-1 receptor antagonists in chemotherapy-induced emesis: summary of clinical trials. *Cancer Invest* 2004; 22: 569–576.

Coordinating authors for the ESMO Guidelines Task Force: J. Herrstedt<sup>1</sup>, M. S. Aapro<sup>2</sup>, F. Roila<sup>3</sup> & V. V. Kataja<sup>4</sup>

<sup>1</sup>Invited author, University Hospital Herlev, Dept. of Oncology 54B1, DK-2730 Herlev, Denmark; <sup>2</sup>Invited author, Clinique de Genolier, 1 route du Muids, CH-1245 Genolier, Switzerland; <sup>3</sup>Invited author, Medical Oncology Division, Silvestrini Hospital, 06080 S.Sisto, Perugia, Italy; <sup>4</sup>Assigned task force member, University Hospital of Kuopio, POB 1777, FIN-70211 Kuopio, Finland

Approved by the ESMO Guidelines Task Force: April 2002, last update December 2004.

*Correspondence to:*  
ESMO Guidelines Task Force  
ESMO Head Office  
Via La Santa 7  
CH-6962 Viganello-Lugano  
Switzerland
